# Supplementary material
Source: MDPI journal article supplement (https://www.mdpi.com/2227-9040/9/2/35)
Supplement: s1 [file s1]

## Supplementary Figures

# Graphite Studded with Facile-Synthesized Cu<sub>2</sub>O Nanoparticles-Based Cubes as a Novel Electrochemical Sensor for Highly Sensitive Voltammetric Determination of Mebeverine Hydrochloride

Ahmed H. Naggar<sup>1,2,\*</sup>, Ahmed Kotb<sup>2</sup>, Ahmed A. Gahlan<sup>2</sup>, Mahmoud H. Mahross<sup>2</sup>  
Abd El-Aziz Y. El-Sayed<sup>2</sup> & Adel A. Abdelwahab<sup>1,2</sup>

<sup>1</sup> Department of Chemistry, College of Science and Arts, Jouf University, Al Qurayyat, 75911, Saudi Arabia

<sup>2</sup> Chemistry Department, Faculty of Science, Al-Azhar University, Assiut, 71524, Egypt

\* Correspondence: [ahayoub@ju.edu.sa](mailto:ahayoub@ju.edu.sa), [ahnayoub@azhar.edu.eg](mailto:ahnayoub@azhar.edu.eg)

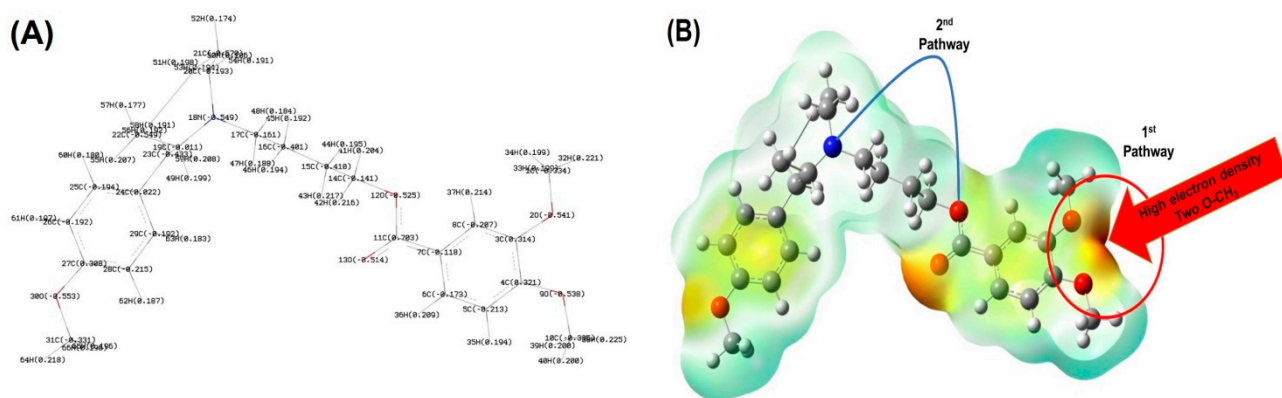

Figure S1. (A) Mulliken charges diagram of MEB atoms, (B) MEP of MEB.

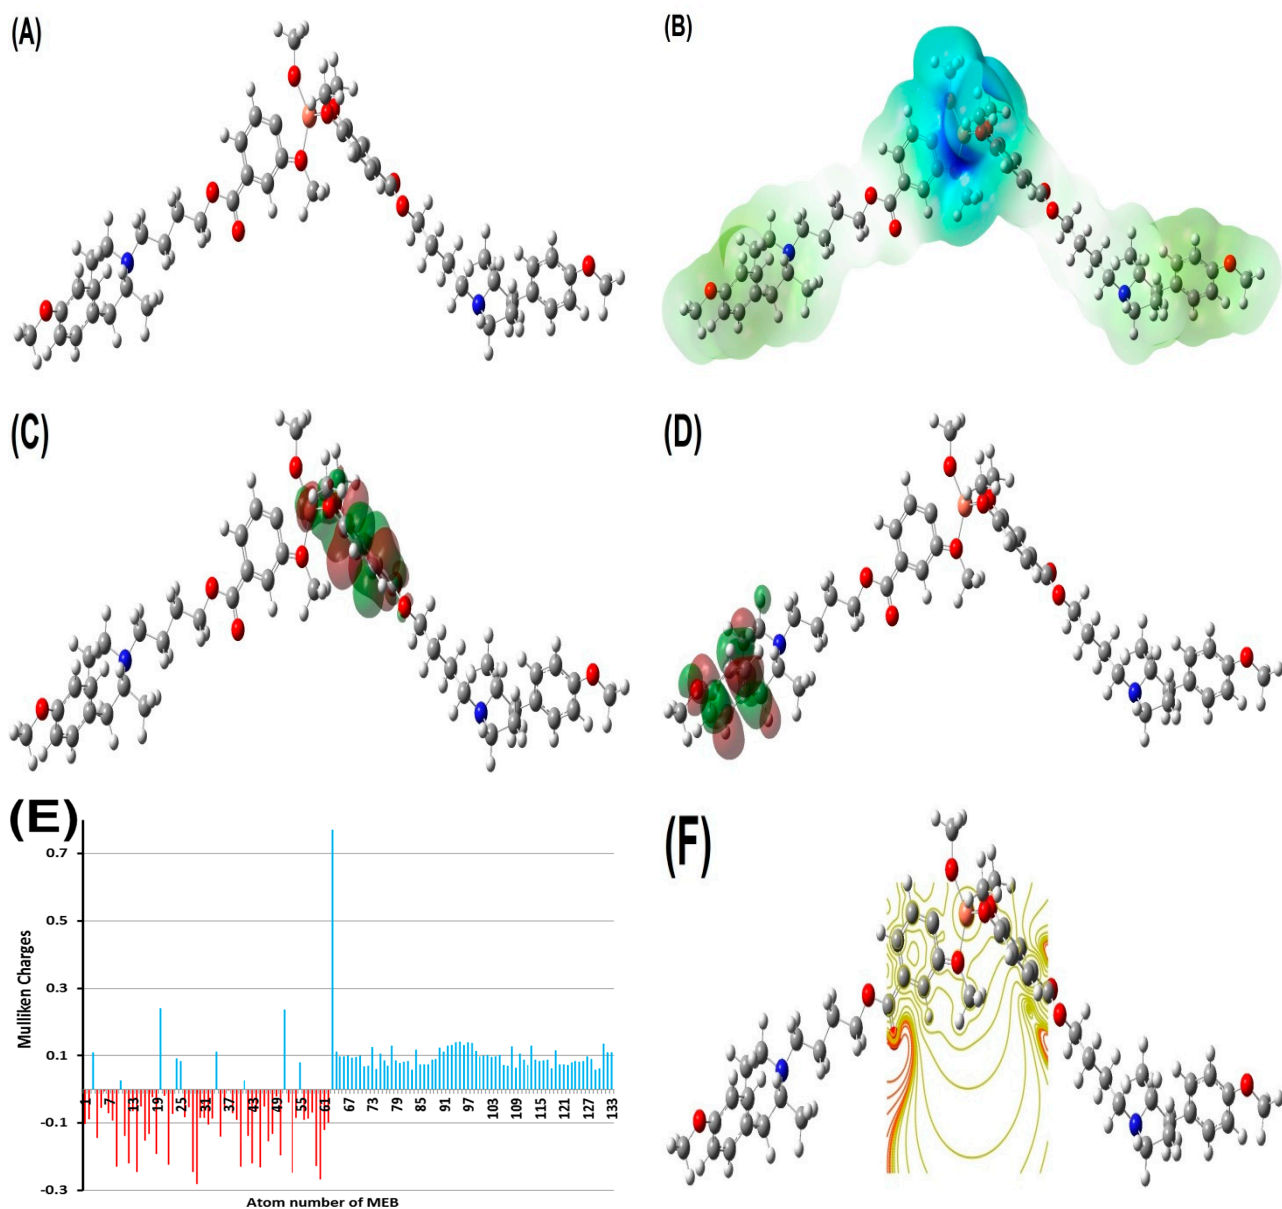

**Figure S2.** (A) Optimized geometric structures; (B) MEP; Molecular orbital (C) HOMO, (D) LUMO, (E) Mulliken charges diagram; and (F) counter plot of MEB-Cu complex.

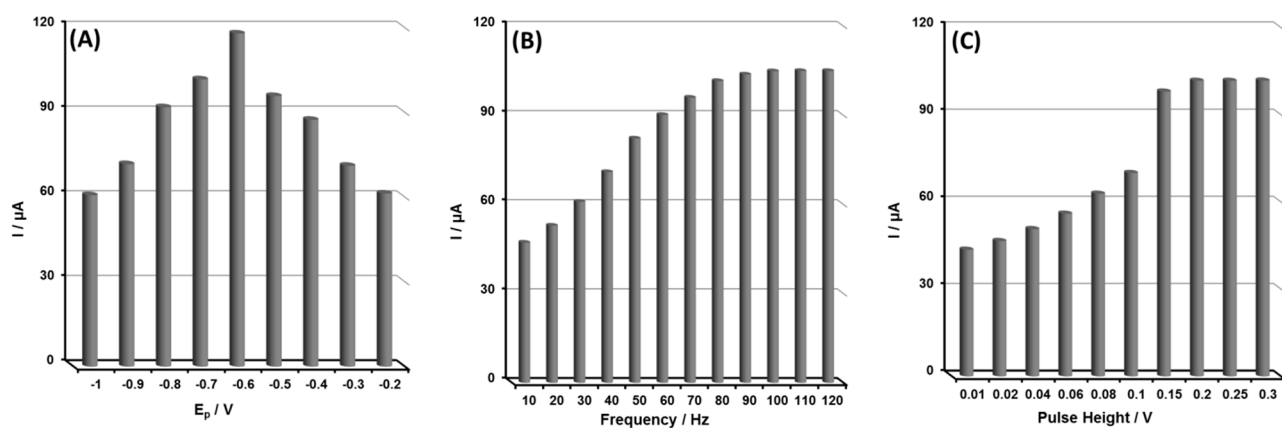

**Figure S3.** Different optimized instrumental conditions on recorded oxidation peak current of  $2 \times 10^{-5} \text{ M}$  MEB in Britton–Robinson buffer (pH  $\approx 8.0$ ) using  $\text{Cu}_2\text{ONPs–C@G/PE}$ : **(A)** Effect of accumulation potential (V), **(B)** Effect of frequency (Hz) and **(C)** Effect of pulse height (V).

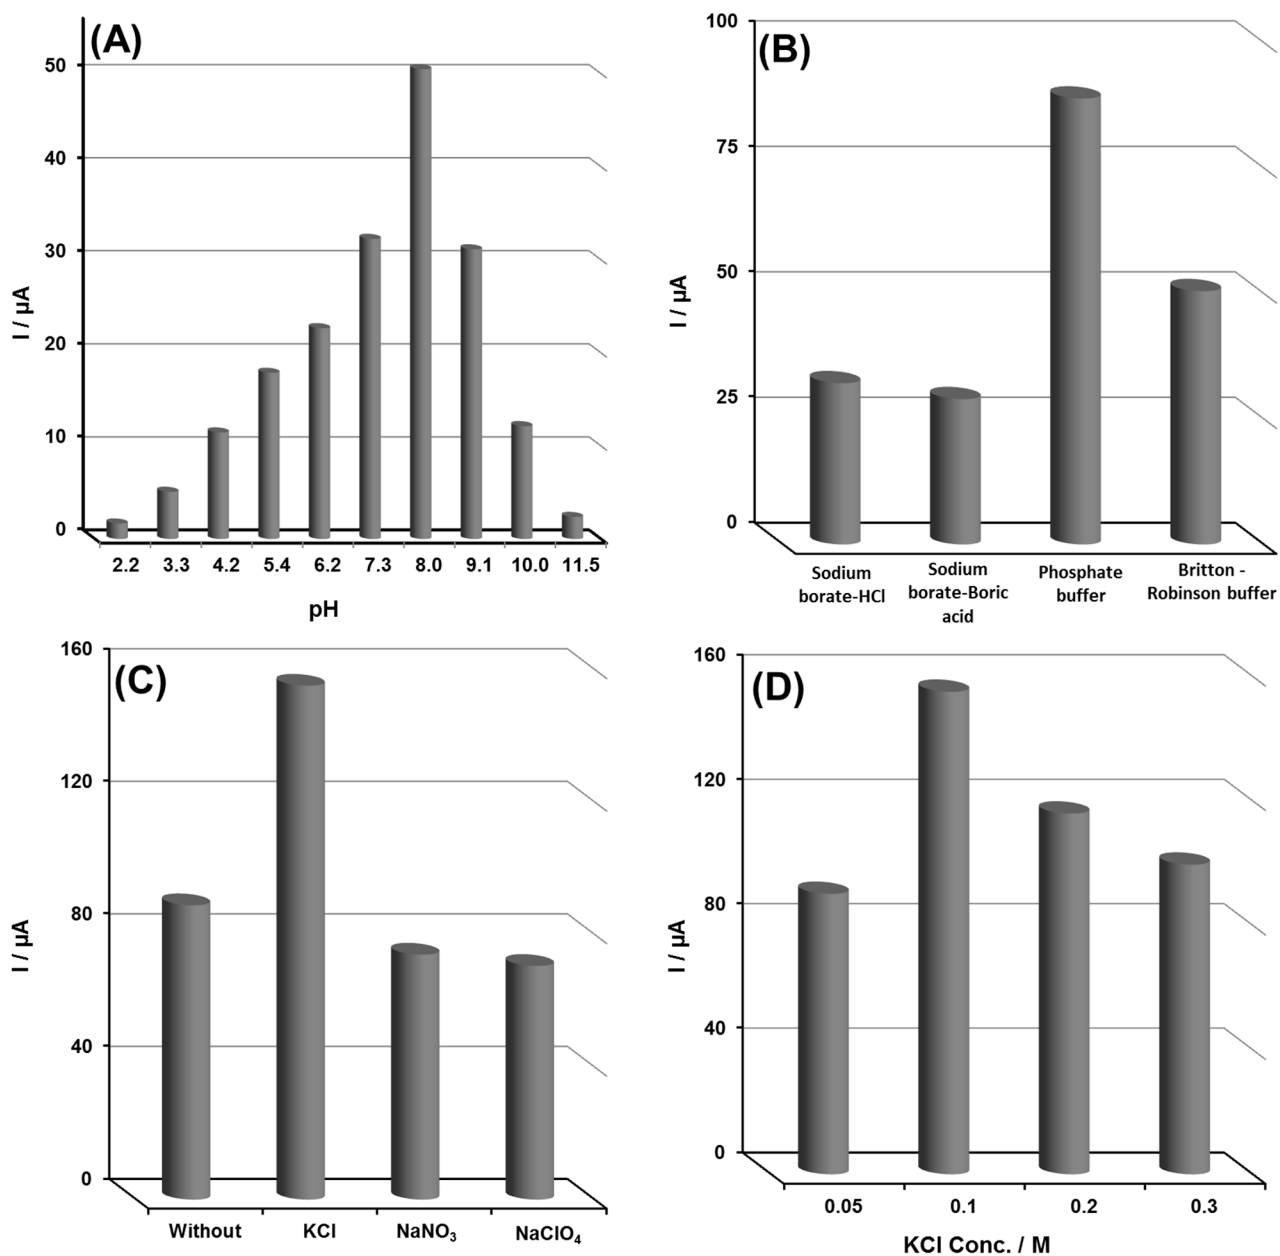

**Figure S4.** Different optimized experimental parameters on recorded oxidation peak current of  $2 \times 10^{-5}$  M MEB using  $\text{Cu}_2\text{ONPs-C@G/PE}$ : **(A)** Effect of pH, **(B)** Effect of buffer type at pH  $\approx$  8.0, **(C)** Effect of supporting electrolyte type, and **(D)** Effect of selected supporting electrolyte concentration.

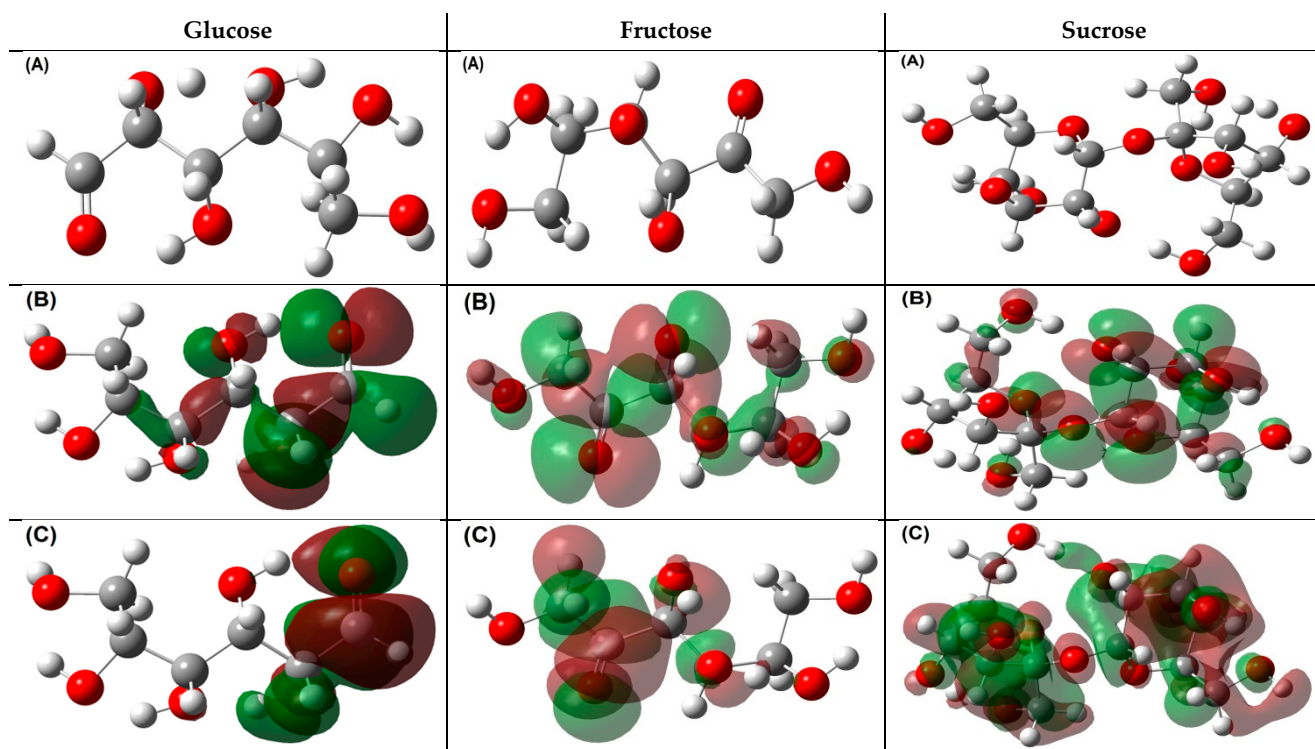

**Figure S5.** Optimized structure of (A) Molecular orbital, (B) HOMO and (C) LUMO of glucose, fructose and sucrose.

**Table S1.** Calculated quantum chemical parameters of MEB–Cu complex.

| Quantum parameter                    | Law related to quantum parameter                 | MEB–Cu complex values |
|--------------------------------------|--------------------------------------------------|-----------------------|
| $E_{\text{HOMO}}$                    | -----                                            | -0.16343              |
| $E_{\text{LUMO}}$                    | -----                                            | -0.15412              |
| Separation energies ( $\Delta E$ )   | $\Delta E = E_{\text{LUMO}} - E_{\text{HOMO}}$   | 0.0093                |
| Ionization potentials ( $I$ )        | $I = -E_{\text{HOMO}}$                           | 0.1634                |
| Electron affinity ( $A$ )            | $A = -E_{\text{LUMO}}$                           | 0.1541                |
| Chemical potential ( $\mu$ )         | $\mu = I + A / 2$                                | 0.1588                |
| Electronegativity's ( $X$ )          | $X = -\mu$                                       | -0.1588               |
| Absolute hardness ( $\eta$ )         | $\eta = (E_{\text{LUMO}} - E_{\text{HOMO}}) / 2$ | 0.0047                |
| Absolute softness ( $\sigma$ )       | $\sigma = 1 / \eta$                              | 214.88                |
| Global electrophilicity ( $\omega$ ) | $\omega = \mu^2 / 2\eta$                         | 2.7084                |
| Total energy ( $TE$ )                | -----                                            | -4394.3 a.u.          |
| Dipole moment ( $\mu$ )              | -----                                            | 7.99 debye            |

**Table S2:** The calculated  $\Delta E$  of MEB and some studied excipients

| Compound | $\Delta E$ |
|----------|------------|
| MEB      | 0.1203     |
| Glucose  | 0.1639     |
| Fructose | 0.1760     |
| Sucrose  | 0.2441     |
